# Supplementary material
Source: publisher site journal article supplement (https://www.dovepress.com/article/319972)
Supplement: Supplementary file 1 [file get_supplementary_file.php]

**Supplementary file**

**Methods**

***Oscillometry and Spirometry Measurements***

IOS was performed by using the Jaeger MasterScreen–IOS (Carefusion Technologies, San Diego, CA, USA), following standard recommendations1. All subjects underwent IOS before spirometry because forced expiration manoeuver might change per se airway tone. In short, participants were asked to wear a nose clip and were seated during tidal breathing with their neck slightly extended and their lips sealed tightly around the mouthpiece, while firmly supporting their cheeks with their hands. At least three trials, each lasting 30 seconds, were performed, and mean values were taken for each value.

Respiratory resistance at 5 Hz and 20 Hz (R5 and R20, in kPa·s·L−1) were used as indices of total and proximal airway resistance, respectively, and the fall in resistance from 5 Hz to 20 Hz (R5 – R20, in kPa·s·L−1) was considered to be an index for the resistance of peripheral airways. Moreover, reactance at 5 Hz (X5, in kPa·s·L−1) and the integrated area of low-frequency reactance (AX, in kPa·L−1) from 5 Hz to resonant frequency (FRes, in Hz) were considered representative markers of peripheral airway abnormalities. Data are presented as raw data. A conservative upper limit of normal for R5 – R20 was chosen at 0.070 kPa·s·L−1 to define the presence of SAD.2–4

Spirometry was performed by using a flow-sensing spirometer connected to a computer for data analysis (Vmax 22 and 6200; SensorMedics, Yorba Linda, CA, USA) according to the international guidelines.5 FEV1, FVC, and forced expiratory flow in the middle half of the patient's exhaled volume (FEF25-75) were recorded and expressed as absolute values (liters) and as a percentage of predicted value (% pred.). The FEV1/FVC and FEV3/FEV6 values were recorded and expressed as a ratio. The lower limit of normal for FEV3/FEV6 values was calculated according to the equations of Hansen et al. 6

**References**

1. Thamrin C, Dellacà RL, Hall GL, et al. Technical standards for respiratory oscillometry: Test loads for calibration and verification. *Eur Respir J*. 2020;56(4). doi:10.1183/13993003.03369-2020

2. Oppenheimer BW, Goldring RM, Herberg ME, et al. Distal airway function in symptomatic subjects with normal spirometry following world trade center dust exposure. *Chest*. 2007;132(4):1275-1282. doi:10.1378/chest.07-0913

3. Lipworth B, Manoharan A, Anderson W. Unlocking the quiet zone: the small airway asthma phenotype. *Lancet Respir Med*. 2014;2(6):497-506. doi:10.1016/s2213-2600(14)70103-1

4. Crisafulli E, Pisi R, Aiello M, et al. Prevalence of Small-Airway Dysfunction among COPD Patients with Different GOLD Stages and Its Role in the Impact of Disease. *Respiration*. 2016;93(1):32-41. doi:10.1159/000452479

5. Graham BL, Steenbruggen I, Barjaktarevic IZ, et al. Standardization of spirometry 2019 update an official American Thoracic Society and European Respiratory Society technical statement. *Am J Respir Crit Care Med*. 2019;200(8):E70-E88. doi:10.1164/rccm.201908-1590ST

6. Hansen JE, Porszasz J, Casaburi R, Stringer WW. Re-Defining Lower Limit of Normal for FEV1/FEV6, FEV1/FVC, FEV3/FEV6 and FEV3/FVC to Improve Detection of Airway Obstruction. Chronic Obstr Pulm Dis. 2015 Mar 10;2(2):94-102. doi: 10.15326/jcopdf.2.2.2014.0144. PMID: 28848835; PMCID: PMC5556964.
